# Supplementary material
Source: Springer Nature journal article supplement (https://www.springermedizin.de/resource/supplementary/12943_2012_1116_MOESM2_ESM.pdf/9552528)

## EIA PG2 24h

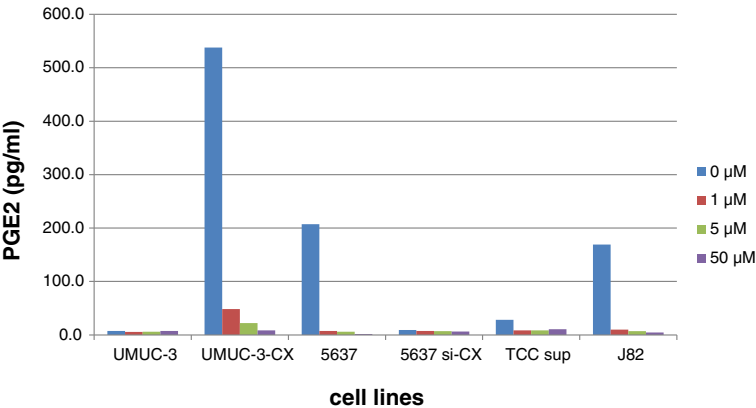

## EIA PGE2 48h

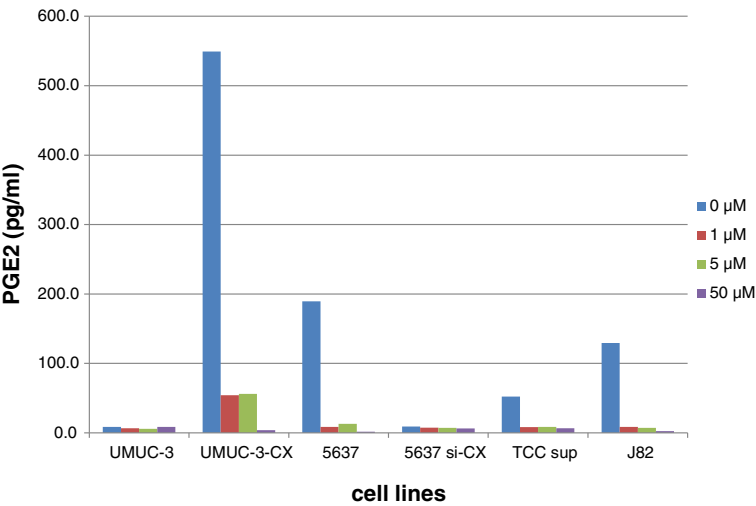

Supplement: MOESM2 [file 9552528]
